# Supplementary material
Source: MDPI journal article supplement (https://www.mdpi.com/2075-163X/9/2/69)

Supplementary Figure S1. Sampling areas in different biotopes of sulfide ores in Armenia.

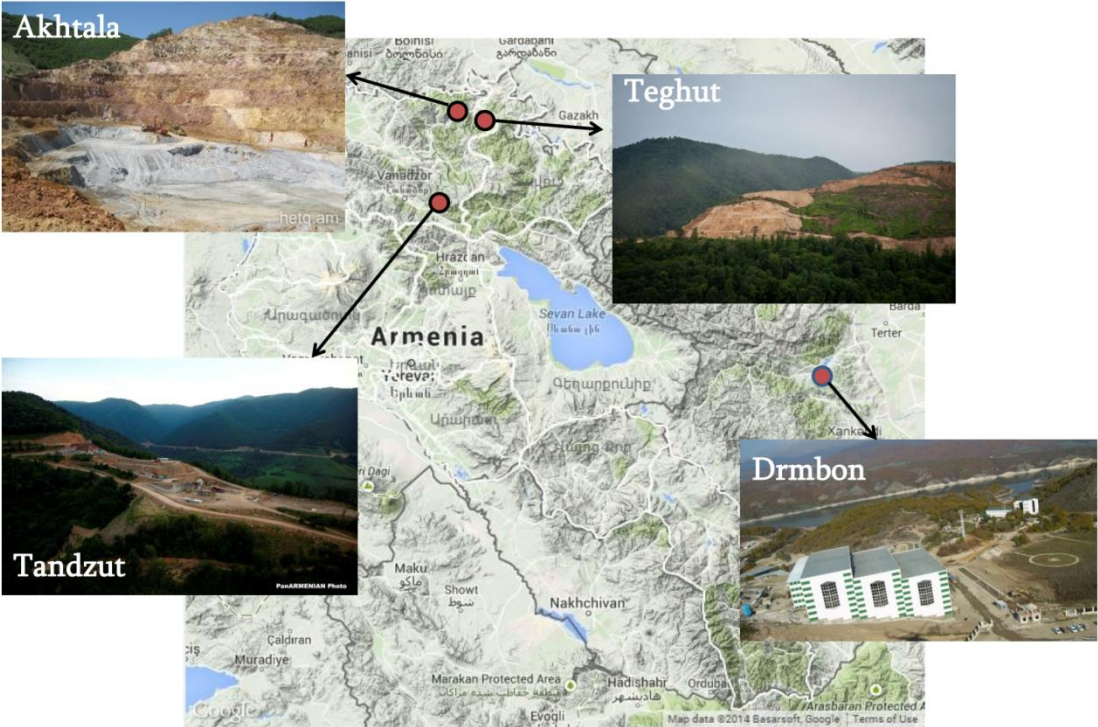

Supplement: s1 [file s1]
